# Supplementary material for: “Everything the hujur tells is very educative but if I can’t not apply those in my own life then there is no meaning”: A mixed-methods process evaluation of a smoke-free homes intervention in Bangladesh.
Source: Research Square preprint supplement (doi:10.21203/rs.3.rs-1071655/v1), 2021-11-17
Supplement: Supplementary file 2 [file 6df1ea8beb823e1619a292c5.docx]

**Additional File 2:** Triangulation matrix for IAQ feedback

| **Meta-theme** | | **Household lead interviews**  **(N=20 men, N=10 women)** | **Household lead questionnaire (N=848 men, N=52 women)** | **Research team records** | **Level of congruence** | **Conclusion** |
| --- | --- | --- | --- | --- | --- | --- |
| Implementation | Frequency |  |  | IAQ feedback delivered to all 640 households | N/A | Good frequency of intervention |
| Fidelity |  |  |  | No data | No data |
| Reach | Majority remembered receiving the IAQ feedback, half reported another household member receiving the report. Minority commented that they could not read it. | 98.9% of households received the IAQ feedback |  | Convergent | Good reach of intervention |
| Mechanisms of impact | Acceptability of the intervention | Consensus that IAQ feedback was informative and motivational |  |  |  | Good acceptability of intervention |
| Barriers and drivers to change (related to the individual) | Consensus that that knowledge about SHS was new and changed their SHS attitudes, social norms and intended to create a SFH.  No one mentioned planning for this. |  |  |  | Drivers to change were new SFH knowledge with corresponding positive attitudes, social norms and intentions.  Barriers were a lack of plans. |
| Self-reported SHS behavioura | Half of men/women reported male household members now smoked outside, prompted by new SHS knowledge from IAQ feedback. | 43.9% to 48.5% of households reported nobody smoking in home at 3-month follow-up.  60.1% of households reported that the IAQ feedback was useful in achieving a SFH |  | Convergent | Only half of households reported a SFH post-intervention.  Moderate usefulness of IAQ intervention. |
| Context | Impact on implementation |  |  |  |  | No data |
| Impact on SHS behaviour changeb | Minority of men/women spoke of children motivating men to smoke outside, conversely social norms prevented some asking visitors to smoke outside.  Majority of men could identify other places to smoke. A minority could not. |  |  | N/A | Social and physical context barriers and drivers to creating a SFH were evident. |

*Note.* Convergent = in agreement, complementary = partial agreement, contradictory = disagreement, silent = findings do not occur in a dataset but may have been expected to do so [29]. aSame self-reported SHS behaviourdata (mechanisms of impact) and bimpact on outcomes (context) reported in Additional Files 1 and 2.
